# Supplementary material for: Longitudinal prediction of outcome in idiopathic pulmonary fibrosis using automated CT analysis
Source: PubMed Central journal article supplement (PMC6860992; doi:10.1183/13993003.02341-2018), 2019-09-30
Supplement: ERJ-02341-2018.Shareable.pdf [file ERJ-02341-2018.Shareable.pdf]

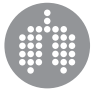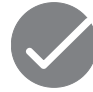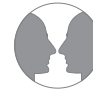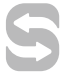

SHAREABLE PDF

# Longitudinal prediction of outcome in idiopathic pulmonary fibrosis using automated CT analysis

Joseph Jacob <sup>1,2</sup>, Brian J. Bartholmai<sup>3</sup>, Coline H.M. van Moorsel<sup>4,5</sup>, Srinivasan Rajagopalan<sup>3</sup>, Anand Devaraj<sup>6</sup>, Hendrik W. van Es<sup>7</sup>, Teng Moua<sup>8</sup>, Frouke T. van Beek<sup>4</sup>, Ryan Clay<sup>8</sup>, Marcel Veltkamp<sup>4,5</sup>, Maria Kokosi<sup>9</sup>, Angelo de Lauretis<sup>10</sup>, Eoin P. Judge<sup>11</sup>, Teresa M. Jacob<sup>12</sup>, Tobias Peikert<sup>8</sup>, Ronald Karwoski<sup>13</sup>, Fabien Maldonado<sup>14</sup>, Elisabetta Renzoni<sup>9</sup>, Toby M. Maher<sup>15,16</sup>, Andre Altmann <sup>2</sup> and Athol U. Wells<sup>9</sup>

**Affiliations:** <sup>1</sup>Dept of Respiratory Medicine, University College London, London, UK. <sup>2</sup>Centre for Medical Image Computing, University College London, London, UK. <sup>3</sup>Dept of Radiology, Mayo Clinic Rochester, Rochester, MN, USA. <sup>4</sup>St Antonius ILD Center of Excellence, Dept of Pulmonology, St. Antonius Hospital, Nieuwegein, The Netherlands. <sup>5</sup>Division of Heart and Lungs, University Medical Center Utrecht, Utrecht, The Netherlands. <sup>6</sup>Dept of Radiology, Royal Brompton Hospital, London, UK. <sup>7</sup>Dept of Radiology, St. Antonius Hospital, Nieuwegein, The Netherlands. <sup>8</sup>Dept of Pulmonary Medicine, Mayo Clinic Rochester, Rochester, MN, USA. <sup>9</sup>Interstitial Lung Disease Unit, Royal Brompton Hospital, Royal Brompton and Harefield NHS Foundation Trust, London, UK. <sup>10</sup>Division of Pneumology, "Guido Salvini" Hospital, Garbagnate Milanese, Italy. <sup>11</sup>Dept of Respiratory Medicine, Aintree University Hospital, Liverpool, UK. <sup>12</sup>Dept of Radiology, St Georges Hospital, London, UK. <sup>13</sup>Dept of Physiology and Biomedical Engineering, Mayo Clinic Rochester, Rochester, MN, USA. <sup>14</sup>Division of Allergy, Pulmonary and Critical Care Medicine, Vanderbilt University Medical Center, Nashville, TN, USA. <sup>15</sup>NIHR Respiratory Clinical Research Facility, Royal Brompton Hospital, London, UK. <sup>16</sup>Fibrosis Research Group, National Heart and Lung Institute, Imperial College, London, UK.

**Correspondence:** Joseph Jacob, Dept of Respiratory Medicine, Rayne Institute, University Street, University College London, WC1E 6JF, UK. E-mail: j.jacob@ucl.ac.uk

@ERSpublications

**Change in the vessel-related structures, a computer-derived CT variable, is a strong predictor of outcome in idiopathic pulmonary fibrosis and can increase power in future drug trials when used as a co-endpoint alongside forced vital capacity change** <http://bit.ly/2M7DfKS>

**Cite this article as:** Jacob J, Bartholmai BJ, van Moorsel CHM, *et al.* Longitudinal prediction of outcome in idiopathic pulmonary fibrosis using automated CT analysis. *Eur Respir J* 2019; 54: 1802341 [<https://doi.org/10.1183/13993003.02341-2018>].

This single-page version can be shared freely online.

*To the Editor:*

The advent of antifibrotic agents [1, 2] as standard of care in idiopathic pulmonary fibrosis (IPF) requires that new non-inferiority IPF drug trials will need to identify smaller declines of forced vital capacity (FVC). Marginal annualised FVC declines (between 5.00 and 9.99%) are particularly challenging to interpret as they might reflect measurement variation or genuine clinical deterioration [3]. Following on from previous baseline-only computed tomography (CT) analyses [4], the current study examined whether changes in computer features (CALIPER) across serial CT examinations could be considered as a trial co-endpoint, particularly with regard to adjudicating marginal FVC declines, and therefore improve the sensitivity of IPF drug trials.
